# Supplementary material
Source: PubMed Central journal article supplement (PMC5103808)
Supplement: aasm.39.12.2201s1.pdf [file aasm.39.12.2201s1.pdf]

**Table S1**—Average percent of transitions from the state-pair category in each row to the state-pair category in each column.

|                | <b>SWS/QW</b> | <b>SWS/SWS</b> | <b>TR/SWS</b> | <b>SWS/TR</b> | <b>TR/TR</b> | <b>REM/TR</b> | <b>REM/REM</b> |
|----------------|---------------|----------------|---------------|---------------|--------------|---------------|----------------|
| <b>QW/QW</b>   | 32            | -              | -             | -             | -            | -             | -              |
| <b>SWS/AW</b>  | 30            | -              | -             | -             | -            | -             | -              |
| <b>SWS/QW</b>  | -             | 54             | -             | -             | -            | -             | -              |
| <b>SWS/SWS</b> | 18            | -              | 30            | 12            | 10           | -             | -              |
| <b>TR/SWS</b>  | -             | 58             | -             | -             | 20           | -             | -              |
| <b>SWS/TR</b>  | -             | 68             | -             | -             | -            | -             | -              |
| <b>TR/TR</b>   | -             | -              | -             | 30            | -            | 14            | 11             |
| <b>REM/TR</b>  | -             | -              | -             | -             | -            | -             | 77             |

**Table S2**—Average percent of transitions to the state-pair category in each row from the state-pair category in each column.

|                | <b>SWS/QW</b> | <b>SWS/SWS</b> | <b>TR/SWS</b> | <b>SWS/TR</b> | <b>TR/TR</b> | <b>REM/TR</b> |
|----------------|---------------|----------------|---------------|---------------|--------------|---------------|
| <b>SWS/QW</b>  | -             | 35             | -             | -             | -            | -             |
| <b>SWS/SWS</b> | 27            | -              | 27            | 11            | -            | -             |
| <b>TR/SWS</b>  | -             | 67             | -             | -             | -            | -             |
| <b>SWS/TR</b>  | -             | 65             | -             | -             | 19           | -             |
| <b>TR/TR</b>   | -             | 42             | 41            | -             | -            | -             |
| <b>REM/TR</b>  | -             | -              | -             | -             | 46           | -             |
| <b>REM/REM</b> | -             | -              | -             | -             | 16           | 39            |

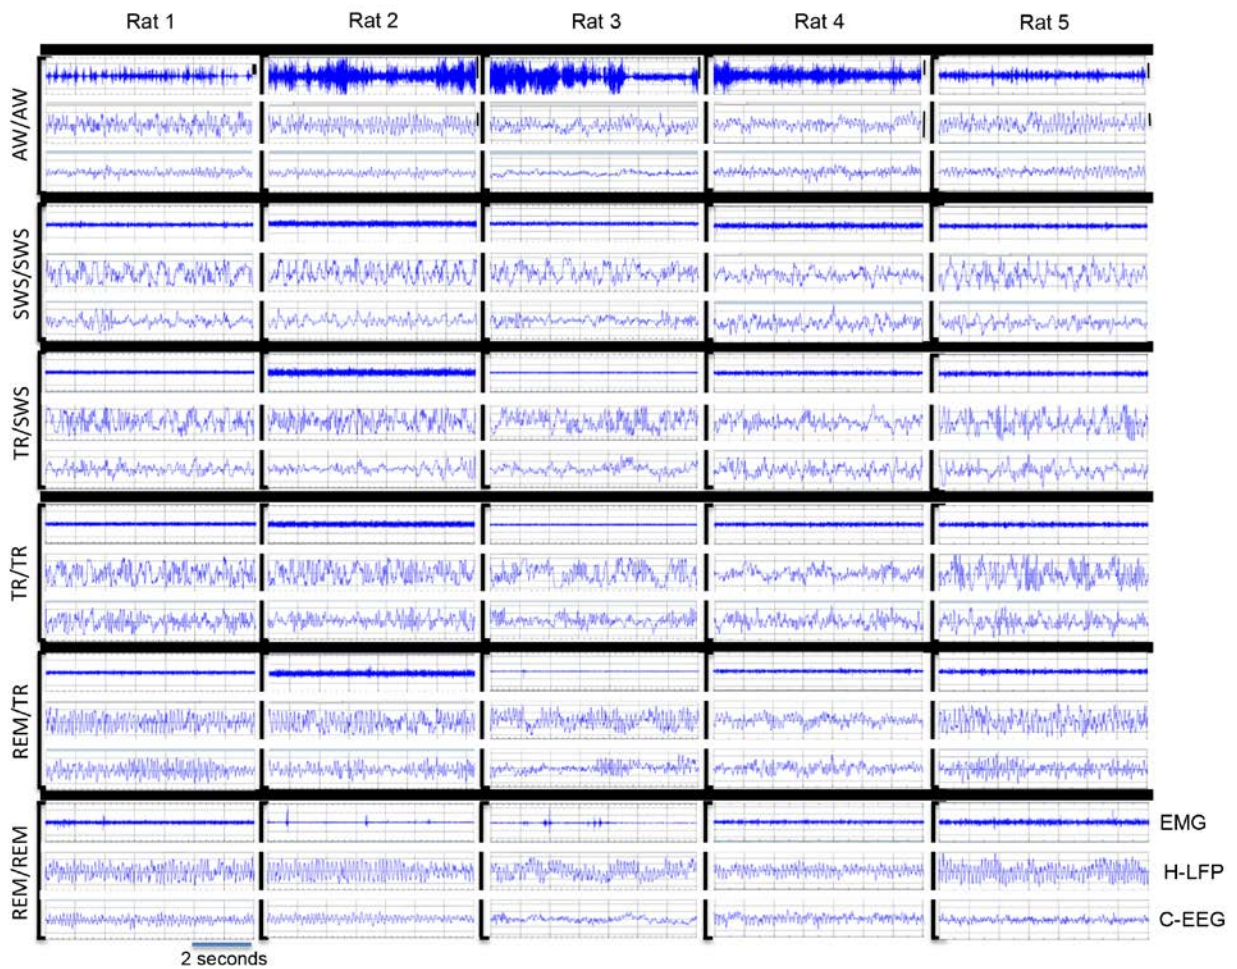

**Figure S1**—Examples of state-pair epochs from all five rats. Seven seconds out of each 10-sec epoch is shown for brevity. Vertical bars to the right of each trace in the uppermost active wake (AW/AW) state-pair indicate 200  $\mu\text{V}$  for the same trace within the column. The bottom right panel shows the trace identities.

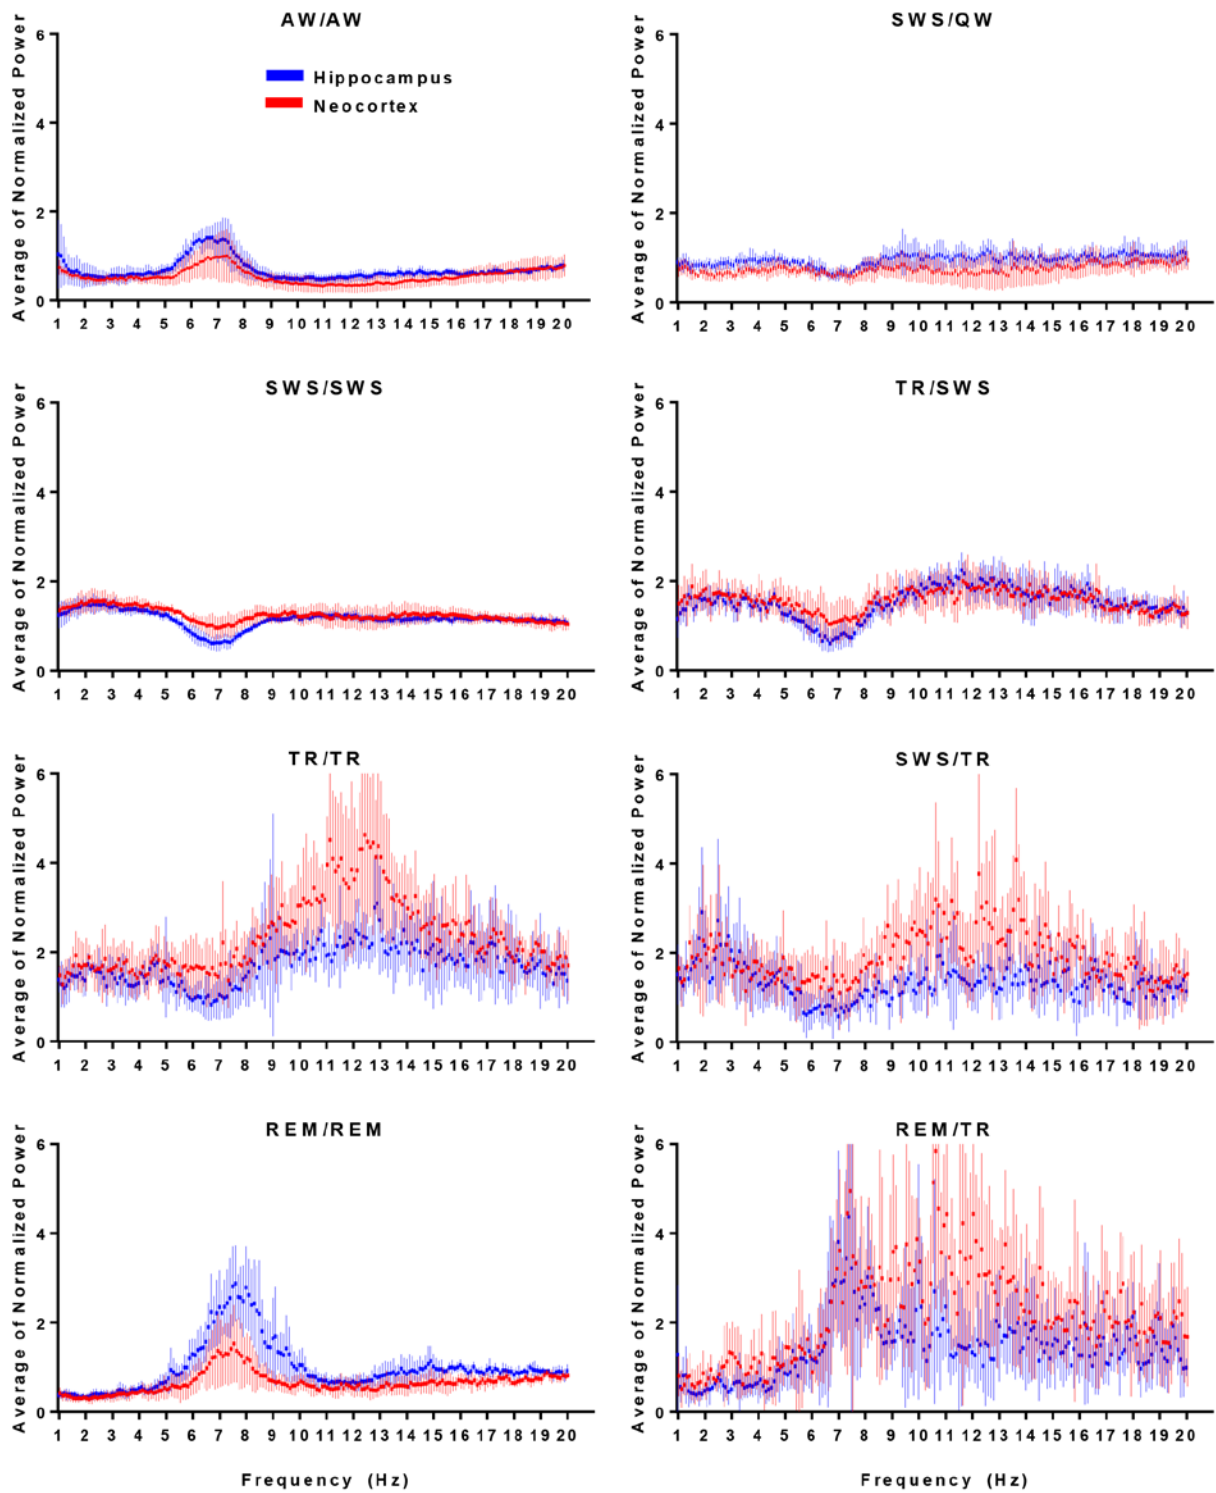

**Figure S2**—Power spectra for select state-pair categories. Normalized power spectra values (mean  $\pm$  standard error of the mean) across frequencies for epochs of relevant state-pair categories. State-pair categories are denoted as “hippocampal state/neocortical state”. Active wake (AW), quiet wake (QW), slow wave sleep (SWS), REM sleep (REM), or transition-to-REM sleep (TR) from hippocampal local field potential (LFP) and neocortical electroencephalogram (EEG) ( $n = 5$ ).
